# Goal-directed vocal planning in a songbird

## Authors

Anja T. Zai<sup>1,2\*</sup>, Anna E. Stepien<sup>1,2</sup>, Nicolas Giret<sup>3</sup>, Richard H.R. Hahnloser<sup>1,2</sup>

## Affiliations

<sup>1</sup>Institute of Neuroinformatics, University of Zurich and ETH Zurich, Switzerland.

<sup>2</sup>Neuroscience Center Zurich (ZNZ), University of Zurich and ETH Zurich, Zurich, Switzerland.

<sup>3</sup>Institut des Neurosciences Paris Saclay, UMR 9197 CNRS, Université Paris Saclay. Use superscript numbers (1, 2, 3) to designate author affiliations.

\* corresponding author: [zaia@ethz.ch](mailto:zaia@ethz.ch)

## Abstract

Songbirds' vocal mastery is impressive, but to what extent is it a result of practice? Can they, similar to humans, plan targeted changes to their songs in a practice-free manner without intermittently singing? In adult zebra finches, we drive the pitch of a song syllable away from its stable (baseline) variant acquired from a tutor, then we withdraw reinforcement and subsequently deprive them of song experience by muting or deafening. In this deprived state, birds do not recover their baseline song. However, they revert their songs towards the target by about one standard deviation of their recent practice, provided the latter signaled a pitch mismatch with the target. Thus, targeted vocal plasticity does not require immediate sensory experience, showing that zebra finches are capable of goal-directed vocal planning.

## Significance statement

Zebra finches are capable of making target-directed changes to their songs without requiring sensory feedback.

## MAIN TEXT

### Introduction

Speech planning is an important part of human communication and the inability to plan speech is manifest in disorders such as apraxia. But to what extent is targeted vocal planning an entirely human ability? Many animals are capable of volitional control of vocalizations (1,2), but are they also capable of planning to selectively adapt their vocalizations towards a target, such as when striving to reduce the pitch mismatch of a note in a song? Target-specific vocal planning is a cognitive ability that requires extracting or recalling a sensory target and forming or selecting the required motor actions to reach the target. Such planning can be covert or overt. Evidence for covert planning is manifest when a targeted motor change is executed without intermittent practice, e.g., when we instantly imitate a word upon first hearing. Overt planning, by contrast, includes practice, but without access to the sensory experience from which target mismatch could be computed, e.g., when we practice a piano piece by tapping on a table.

47 The vocal planning abilities in animals and their dependence on sensory experience  
48 remain poorly explored. Motor learning has been mostly studied in tasks where a skilled  
49 behavioral response must be produced on the spot, such as when a visual target must be hit  
50 by a saccade or by an arm reaching movement (3–6). In this context, motor planning has  
51 been shown to enhance motor flexibility, as it allows separation of motor memories when  
52 there are conflicting perturbations (7). However, for developmental behaviors such as  
53 speech or birdsong that rely on hearing a target early in life (8,9), the roles of practice and  
54 of sensory feedback for flexible vocal control and for target-directed adaptation are  
55 unknown.

56 Recovery of a once-learned vocal skill could also be instantaneous (covert), or it might  
57 require practice (overt). In support of the former, many motor memories are long-lasting  
58 (10), e.g., we can recall the happy-birthday song for years without practice. Some  
59 memories are even hard to get rid of such as accents in a foreign language. By contrast,  
60 practice-dependent, but feedback-independent recovery is argued for by arm reaching  
61 movements: following adaptation to biasing visual feedback, arm movements recover  
62 when the bias is either removed or the visual error is artificially clamped to zero (4,5).  
63 One explanation put forward is that motor adaptation is volatile and has forgetting built-in  
64 (6,11), leading to practice-dependent reappearance of the original motor program even  
65 without informative feedback (11). Given these possibilities, we set out to probe  
66 songbirds' skills of recovering their developmental song target when deprived of either  
67 practice or of sensory feedback.

68 Adult vocal performances in songbirds can be altered by applying external reinforcers  
69 such as white-noise stimuli (12,13). When the reinforcer is withdrawn, birds recover their  
70 original song within hundreds of song attempts (12,14–16). We argued that these attempts  
71 may be unnecessary and birds could recover their original performance by recalling either  
72 1) the original motor program (17–19), or 2) its sensory representation (20,21) plus the  
73 mapping required to hit it (15), or 3) the sensory target (22) and the circuit for translating  
74 that into the original program (14) (Fig. 1A). These options might not need sensory  
75 feedback. Birds' large perceptual song memory capacity (23) would argue for such  
76 possibilities. That is, birds' song practice may be mainly expression of deliberate  
77 playfulness (24), conferring the skill of vocal flexibility rather than serving to reach a  
78 target, evidenced by young birds that explore vocal spaces close to orthogonal to the song-  
79 learning direction (25) and are already surprisingly capable of adult-like singing when  
80 appropriately stimulated (26).

## 81 82 83 **Results**

84 To test whether birds can recover a song syllable without practice, we first reinforced the  
85 pitch of a song syllable away from baseline and then we suppressed birds' singing  
86 capacity for a few days by muting their vocal output. We then tested whether the  
87 subsequently unmuted song has covertly reverted back to the original target. We used  
88 syllable pitch as the targeted song feature, because we found that birds did not reliably  
89 recover syllable duration in experiments in which we induced them to shorten or lengthen  
90 syllable duration (Fig. S1).

91 We first drove pitch away from baseline by at least one standard deviation using a white-  
92 noise (WN) stimulus delivered whenever the pitch within a 16-ms time window locked to

93 the targeted syllable was above or below a manually set threshold (Fig. 1B, see Methods).  
94 We muted these WNm (white-noise reinforced and muted) birds by implanting a bypass  
95 cannula into the abdominal air sac (see Methods). While muted, air is leaking from the  
96 abdominal air sac and as a result, sub-syringeal air pressure does not build up to exceed  
97 the threshold level required for the self-sustained syringeal oscillations (27) that underlie  
98 singing. Physical absence of such oscillations essentially strips muted birds from all pitch  
99 experience.

100  
101 Two birds we muted right after the WN-driven pitch change. After keeping birds for four  
102 days in the muted state, we permanently unmuted them to record their undisturbed songs.  
103 We observed that the two birds had recovered a mere 10% and -6% of their total WN-  
104 driven pitch change. We hypothesized that unreinforced singing would initiate the song  
105 recovery process in WNm birds that we assumed birds might be able to accomplish while  
106 mute. Therefore, we allowed the subsequent 6/8 WNm birds to sing a few hundreds of  
107 target syllables without reinforcement prior to muting them.

108 In some cases, the bypass cannula got clogged during the muted period and birds were  
109 spontaneously unmuted, allowing them to produce a few songs before we reopened the  
110 cannula (Fig. 1C-G). These spontaneous unmuting events were not detrimental to our  
111 experimental procedures, as they allowed us to inspect birds' current song motor program  
112 (Fig. 1C).

113 After spending  $5.1 \pm 1.6$  days (range 3 – 8 d,  $N = 8$ ) in the muted state and upon  
114 unmuting, WNm birds displayed an average normalized residual pitch (*NRP*) of 89%,  
115 which was far from baseline ( $p = 6.2 \cdot 10^{-8}$ ,  $t_{\text{stat}} = -23.6$ ,  $N = 8$  birds, two-sided t-test  
116 of  $H_0: NRP = 0\%$ , songs analyzed in 2 h time window – early (*E*), see methods, Fig. 1),  
117 suggesting that in the muted state, birds are unable to recover their pre-reinforced songs.  
118 The average *NRP* in WNm birds was comparable to that of unmanipulated control (WNC)  
119 birds within the first 2 h after withdrawal of the reinforcer (average *NRP* = 91%,  $p =$   
120  $3.7 \cdot 10^{-11}$ ,  $t_{\text{stat}} = 14.8$ , two-sided t-test for *NRP* = 0%,  $N = 18$  WNC birds). Indeed,  
121 during 5 days without song practice, birds recovered no more pitch distance than birds  
122 normally do within the first 2 h of release from reinforcement ( $p = 0.82$ ,  $t_{\text{stat}} = -0.23$ ,  
123  $N = 8$  WNm and  $N = 18$  WNC birds, two-sided t-test). These findings did not sensitively  
124 depend on the size of the analysis window — we also tested windows of 4 and of 24 h.

125 Subsequently, after 4 days of unmuted song experience (roughly 9 days after withdrawal  
126 of WN), WNm birds displayed an average *NRP* of 30%, which was significantly different  
127 from their *NRP* within the first 2 h after unmuting ( $p = 3 \cdot 10^{-4}$ ,  $t_{\text{stat}} = 4.83$ ,  $N = 8$   
128 birds, two-tailed t-test early (*E*) vs. late (*L*) time window) but still significantly different  
129 from zero ( $p = 0.04$ ,  $t_{\text{stat}} = 2.59$ ,  $N = 8$  birds, two-tailed t-test, late (*L*) time window).  
130 Overall, these findings suggest that either motor practice, sensory feedback, or both, are  
131 necessary for recovery of baseline song.

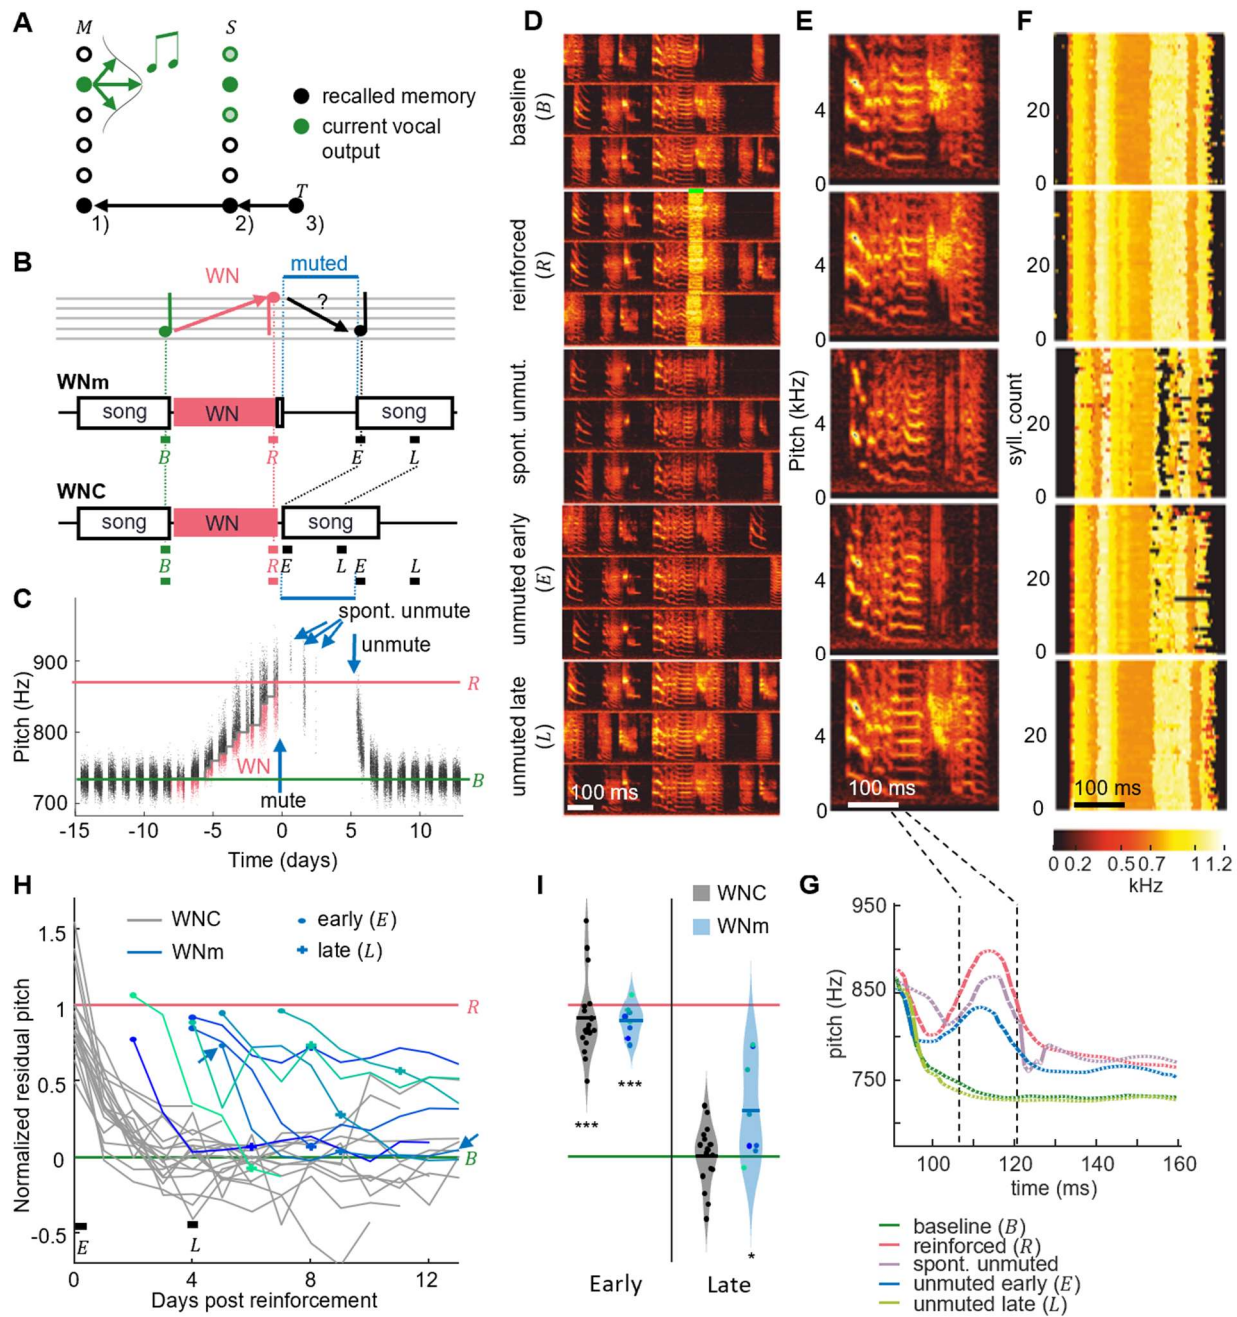

**Fig. 1. Recovery of pitch target requires practice.** (A) Three hypotheses on birds' ability to recover a song target away from their current vocal output (green): 1) they could recall its motor program (*M*), or 2) its sensory representation (*S*) plus the mapping (left black arrow) required to hit it, or, 3) the sensory target (*T*) and the circuit for translating that into the original motor program (arrows). (B) WNm birds were first pitch-reinforced using white noise (WN), then muted, and subsequently unmuted. Pitch recovery from the reinforced (*R*) state towards the baseline (*B*) target is evaluated in early (*E*, no practice) and late (*L*, with practice) analysis windows (all windows are time-aligned to the first 2 h of songs after withdrawal of reinforcement, *E*) and compared to recovery in unmuted control birds (WNC). (C) Syllable pitches (dots, red=reinforced syllables) of an example bird that while muted recovered only about 27% of pitch difference to baseline despite three spontaneous unmute events (arrows). (D) Same bird, spectrograms of example song motifs from 5 epochs: during baseline (*B*), reinforcement (*R*)

133

134

135

136

137

138

139

140

141

142

143

144

145

146

147

with WN (green bar), spontaneous unmuting (spont. unmut), and during permanent unmuting (early – *E* and late – *L*). (E) Example syllables from same 5 epochs. (F) Stack plot of pitch traces (pitch indicated by color, see color scale) of the first 40 targeted syllables in each epoch (‘reinforced’: only traces without WN are shown). (G) Average pitch traces from F), revealing a pitch increase during the pitch-measurement window (dashed black lines) and pitch recovery late after unmuting. (H) WNm birds (blue lines,  $N = 8$ ) showed a normalized residual pitch (*NRP*) far from zero several days after reinforcement (circles indicate unmuting events, arrow shows bird from C) unlike WNC birds (gray lines,  $N = 18$ ). (I) Violin plots of same data restricted to early and late analysis windows ( $***p < 0.001$ ,  $*p < 0.05$ , two-tailed t-test of  $NRP = 0$ ).

Next, we therefore tested whether motor experience but not sensory experience is necessary for recovery, similar to arm reaching movements that can be restored without guiding feedback (4,28). In a second group of WNd birds, we provided slightly more song experience (Fig. 2). Instead of muting, WNd birds were deafened through bilateral cochlea removal. This latter manipulation does not suppress the act of singing as does muting, but it eliminates auditory feedback from singing. Deaf birds could gain access to some pitch information via somatosensory stretch and vibration receptors and/or air pressure sensing (29). Our aim was to test whether such putative pitch correlates are sufficient for recovery of baseline pitch (Fig. 2A). However, in the deaf state, WNd birds did not recover baseline pitch even after 4 days of song practice: on the 5<sup>th</sup> day (late, *L*) after deafening, their average *NRP* was still 50%, which was different from zero ( $p = 0.03$ ,  $t_{stat} = 2.73$ , two-tailed t-test of  $H_0: NRP = 0\%$ ,  $N = 10$ , Fig. 2D) and significantly larger than the average *NRP* of WNC birds on the 5<sup>th</sup> day since withdrawal of reinforcement (difference in  $NRP = 49\%$ ,  $p = 0.003$ ,  $t_{stat} = 3.34$ ,  $df = 26$ ,  $N = 10$  WNd and  $N = 18$  WNC birds, two-tailed t-test).

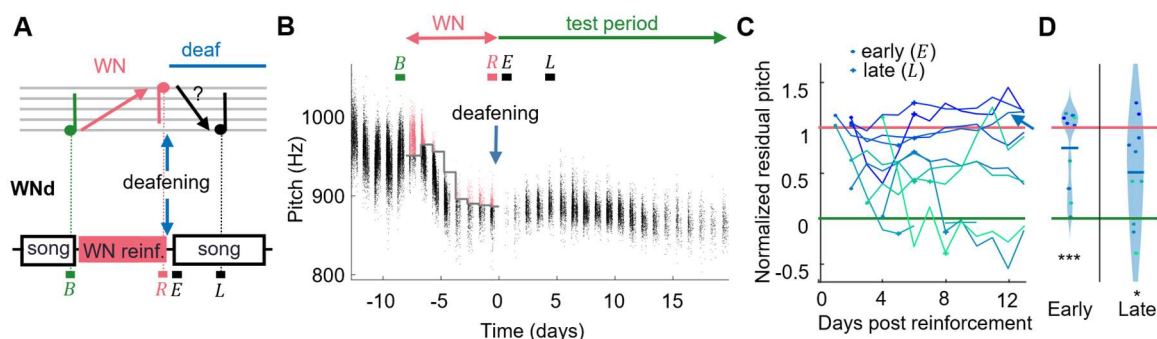

**Fig. 2. Recovery of pitch target is impaired after deafening.** (A) WNd birds were first pitch-reinforced using white noise (WN) and then deafened by bilateral cochlea removal. Analysis windows (letters) as in Fig. 1. (B) Syllable pitches (dots, red=reinforced syllables) of example WNd bird that shifted pitch down by  $d' = -2.7$  during WN reinforcement and subsequently did not recover baseline pitch during the test period. (C) WNd birds ( $N = 10$ ) do not recover baseline pitch without auditory feedback (circles=early window after deafening events, cross=late). (D) Violin plots of same data restricted to early and late analysis windows ( $***p < 0.001$ ,  $*p < 0.05$ , two-tailed t-test of  $NRP = 0$ ).

We speculated that the lack of pitch recovery in WNd birds could be attributable to the sudden deafening experience, which might be too overwhelming to uphold the plan to recover the original pitch target. WN deaf birds did not sing for an average of  $2.3 \pm 1.1$

187  
188  
189  
190

days (range 1 to 4 days) after the deafening surgery, which is a strong indication of an acute stressor (30). We thus inspected a third group of birds (dLO, Fig. 3) taken from (31) that learned to shift pitch while deaf and that underwent no invasive treatment between the pitch reinforcing experience and the test period of song recovery.

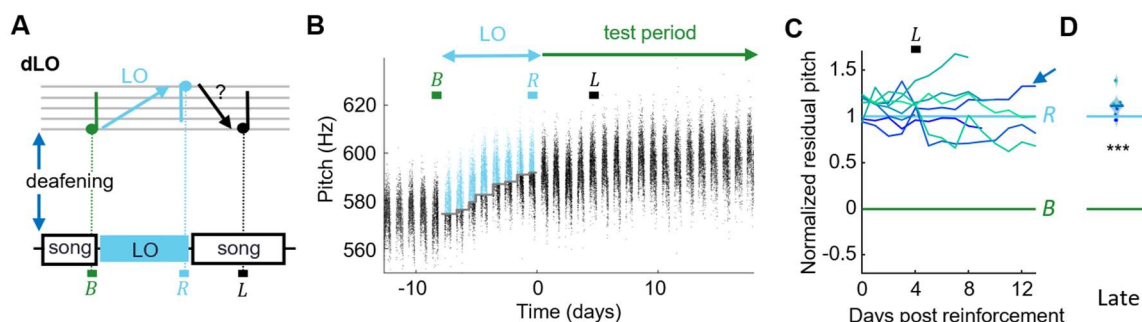

191  
192  
193  
194  
195  
196  
197  
198  
199

**Fig. 3. Deaf birds do not recover pitch target after light-induced mismatch.** (A) dLO birds were first deafened and then pitch-reinforced using a brief light-off (LO) stimulus. Analysis windows (letters) as in Fig. 1. (B) Syllable pitches (dots, blue=LO-reinforced syllables) of example dLO bird that shifted pitch up by  $d' = 3.5$  within a week, but showed no signs of pitch recovery during the test period. (C) dLO birds ( $N = 8$ ) do not recover baseline pitch without auditory feedback. (D) Violin plots of same data restricted to the late analysis window ( $***p < 0.001$ , two-tailed t-test of  $NRP = 0$ ).

200  
201  
202  
203  
204  
205  
206  
207  
208  
209

dLO birds were first deafened, and after they produced stable baseline song for several days, their target syllable pitch was reinforced using pitch-contingent light-off (LO) stimuli, during which the light in the sound recording chamber was briefly turned off upon high- or low-pitch syllable renditions(32). dLO birds displayed an average  $NRP$  of 112% on the 5<sup>th</sup> day since release from LO, which was significantly different from zero ( $p = 3.7 \cdot 10^{-8}$ ,  $t_{stat} = 25.4$ ,  $N = 8$  birds, two-tailed t-test of  $H_0: NRP=0$ ) and was larger than the  $NRP$  in WNC birds on the 5<sup>th</sup> day since release ( $p = 1.3 \cdot 10^{-13}$ ,  $t_{stat} = 14.9$ ,  $df = 24$ ,  $N = 8$  dLO and  $N = 18$  WNC birds, two-sided t-test). Thus, dLO birds were unable to recover baseline pitch, suggesting that song recovery requires undiminished sensory experience, which includes auditory feedback.

210  
211  
212  
213  
214  
215  
216  
217  
218  
219  
220  
221

That song practice and sensory experience are required for full recovery of song does not imply that without experience, birds are incapable of making any targeted changes to their songs at all. We therefore inspected birds' fine-grained vocal output and whether they changed their song in the direction of baseline when deprived of sensory experience. We hypothesized (Fig. 4A), that when birds experience a target mismatch during reinforcement (when they hear that their song deviates from the target), this mismatch will fuel their plan to recover the pitch target, and a portion of this plan they can execute without feedback. If, by contrast, they have no mismatch experience, they will make no corresponding plan. Hence, we predicted that WNd birds that experienced a pitch mismatch would slightly revert their song towards baseline even in the absence of auditory feedback. By contrast, dLO birds that did not experience a mismatch because they did not hear their song while it was reinforced, would not revert towards the target (Fig. 4A).

222  
223  
224  
225

Indeed, WNd birds changed their pitch significantly towards baseline already in the first 2 h of their singing since release from reinforcement (relative to the pitch from the last 2 h during reinforcement,  $d' = -0.60$ ,  $p = 0.03$ ,  $t_{stat} = -2.19$ ,  $df = 9$ ,  $N = 10$  birds, one-sided t-test of  $H_0: d' = 0$ ). A significant approach of pitch baseline was still evident after

4 days of practice, ( $d' = -1.27$ ,  $p = 0.02$ ,  $t_{\text{stat}} = -2.35$ ,  $N = 10$  birds, one-sided t-test, Fig. 4B, D), showing that pitch reversion in deaf birds is persistent. Because the average pitch shift in WNd birds was on the order of one standard deviation ( $d' \approx 1$ ), we conclude that without song experience, birds are able to perform target-directed pitch shifts of about the same magnitude as their current exploratory range (i.e., the denominator of the  $d'$  measure).

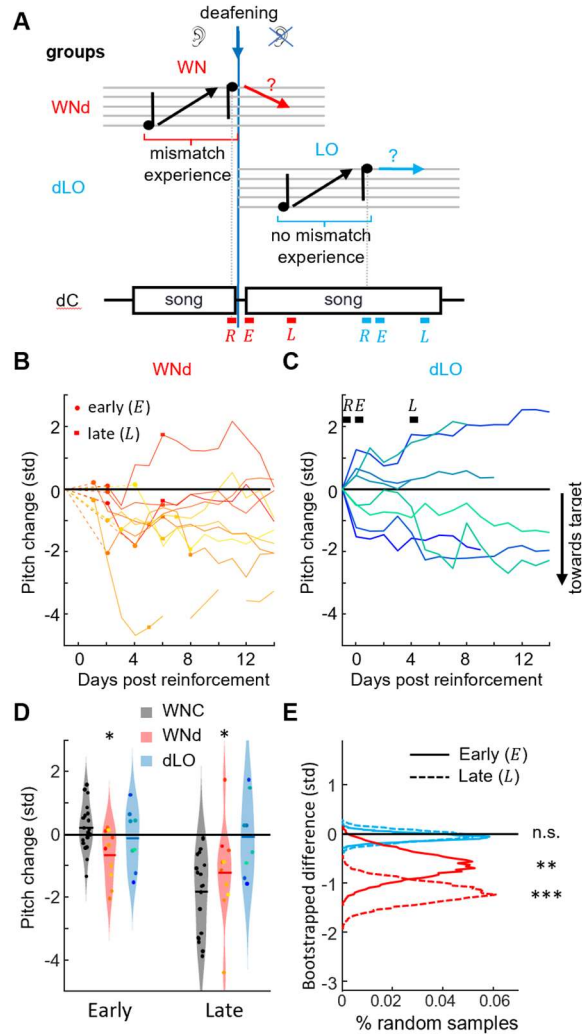

**Fig. 4. Target mismatch experience is necessary for revertive pitch changes.** (A) WNd birds heard a target mismatch during reinforcement whereas dLO birds did not. dC birds were not pitch reinforced, their analysis windows matched those of manipulated birds in terms of time-since-deafening. (B, C) Pitch change between the last 2 h of reinforcement (R) and 2 h windows during the test period time-aligned to the first 2 h of song after withdrawal of reinforcement (E) in std for WNd (red, B), dLO (blue, C) birds. (D) WNd (red) perform both early and late pitch changes in the direction of the baseline target (by about one standard deviation,  $* p < 0.05$ , one-tailed t-test), similar to WNC (gray) and unlike dLO (blue) birds without mismatch experience. (E) Bootstrapped pitch differences between reinforced WNd (blue) and dLO (red) and 10'000 times randomly matched dC birds, shown for early (solid line) and late (dashed line) analysis windows. The stars indicate the bootstrapped probability of a zero average pitch

246 difference between reinforced and dC birds (n.s. not significant, \*\*  $p < 0.01$ , \*\*\*  
247  $p < 0.001$ ).

248  
249 In contrast, dLO birds showed no signs of reverting pitch, neither in the first 2 h since  
250 release of reinforcement ( $d' = -0.13$ ,  $p = 0.36$ ,  $t_{stat} = -0.37$ ,  $df = 7$ ,  $N = 8$  birds,  
251 one-sided t-test), nor after 4 days of practice ( $d' = -0.08$ ,  $p = 0.43$ ,  $t_{stat} = -0.18$ ,  $df =$   
252  $7$ ,  $N = 8$  birds, one-tailed t-test, Fig. 4C, D). The pitch change in dLO birds was  
253 indistinguishable from that in deaf controls (dC) that were not pitch reinforced and had no  
254 plan to shift pitch in either direction (Fig. 4A, E). To discount for the effect of time  
255 elapsed since deafening, we bootstrapped the difference in  $d'$  between dLO birds and dC  
256 birds in matched time windows (see methods). To discount for possible influences of  
257 circadian pitch trends, we assessed early and late pitch changes in reinforced birds and in  
258 dC birds also in 2 h time windows separated by multiples of 24 h: the result of all these  
259 analyses is that significant reversion towards baseline was only seen in WNd birds and  
260 very consistently so (Fig. 4E, Table S1), showing that not current auditory feedback, but  
261 prior experience of a target mismatch is necessary for pitch reversion. Our results thus  
262 argue for a model of song maintenance in which birds extract from target mismatch  
263 experience a plan of reducing the mismatch (Fig. 5), and without sensory feedback, this  
264 plan is limited by the extent of current song practice.  
265

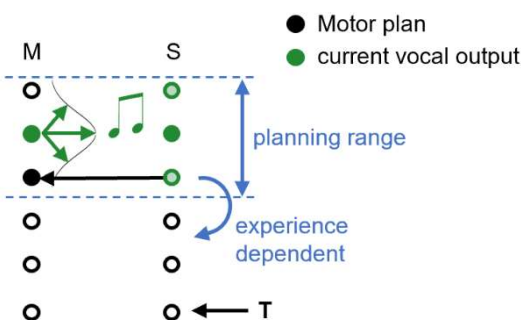

266  
267 **Fig. 5. Schematic illustrating the goal-directed planning of vocal changes.** The song  
268 variability from the last few hours (green arrows, black density) limits (blue  
269 dashed lines) the song targets (filled black dot in M) that birds can overtly plan  
270 without sensory feedback. Sensory experience (green circles under S) is a  
271 prerequisite for consolidating motor plans and for reaching (curved blue arrow) a  
272 target (T) beyond the planning range, e.g. a song variant produced several days  
273 ago.

## 274 Discussion

276 Our work shows that recent auditory experience can drive motor plasticity even while an  
277 individual is deprived of such experience, i.e. zebra finches are capable of overt vocal  
278 planning. But to reach a distant vocal target beyond the pitch range experienced in the  
279 preceding few hours necessitates auditory feedback, which sets a limit to zebra finches'  
280 covert planning ability.

281  
282 Birds' failure to recover baseline pitch without guiding sensory feedback agrees with  
283 reports that binary reinforcement (as we used) slows down or prevents forgetting of the  
284 adapted behavior (5). However, whereas forgetting is fast when sensory errors affect arm  
285 movements (5), the contrary applies to birdsong, where pitch learning from artificial  
286 sensory errors is slower and less forgotten (33) than is pitch learning from binary



287 reinforcement (12,14). Hence, the commonality of short-term visuo-motor adaptation and  
288 of birdsong maintenance is that slow learning leads to slow forgetting, regardless of  
289 whether it is due to sensory errors or reinforcement. Such conclusion also agrees with  
290 observations that zebra finch song does not recover to pre-manipulated forms, both after  
291 restoring auditory feedback after long-term (>5 months) deprivation (34) and after  
292 restoring normal syrinx function after long-term (16 weeks) manipulation with beads (35),  
293 suggesting that song can spontaneously recover only within some limited time since it was  
294 manipulated.

295  
296 The overt planning ability suggests that recovery of a developmentally learned vocal  
297 target is controlled by two hierarchical processes, a highly flexible process with limited  
298 scope ( $d' \approx 1$ , Fig. 4), and a dependent process enabled by experience of the former. Such  
299 motor learning based on separate processes for acquisition and retention is usually referred  
300 to as motor consolidation (3,36,37). Accordingly, the hierarchically lower process is  
301 independent of immediate sensory experience, but its consolidation requires experience.  
302 Perhaps then, it is the sensory experience itself that is consolidated, and therefore,  
303 consolidation of sensory experience may be a prerequisite for extensive planning.

304 Consolidation in motor learning generally emerges from anatomically separated  
305 substrates for learning and retention (4). Such separation also applies to songbirds. Both  
306 reinforcement learning of pitch and recovery of the original pitch baseline depend on the  
307 anterior forebrain pathway and its output, the lateral magnocellular nucleus of the anterior  
308 nidopallium (LMAN)(15). LMAN generates a pitch bias that lets birds escape negative  
309 pitch reinforcers and recover baseline pitch when reinforcement is withdrawn (13), thus is  
310 likely involved in planning. This pitch bias is consolidated outside of LMAN (15,38) in a  
311 nonlinear process that is triggered when the bias exceeds a certain magnitude (39). This  
312 threshold magnitude is roughly identical to the planning limit we find ( $d' \approx 1$ ), suggesting  
313 that the consolidation of LMAN-mediated motor plasticity corresponds to birds' planning  
314 limit. Because LMAN seems capable of executing a motor plan without sensory feedback,  
315 our work provides a new perspective on the neural basis of birdsong learning and  
316 consolidation in and around LMAN.

317 The formation of a planned motor change may not require LMAN itself, because  
318 pharmacological suppression of LMAN sets the bias to zero, but upon removal of output  
319 suppression, the pitch of the song syllable that was targeted by reinforcement jumps by  
320 about 1% away from the reinforced pitch zone (40), which corresponds to about  $d' = 1$ ,  
321 about the planning limit we find. Originally, this jump was interpreted as evidence of  
322 functional connectivity or an efference copy between the anterior forebrain pathway of  
323 which LMAN is part of and some other unspecified variability-generating motor area.  
324 However, in our view, a simpler explanation requiring neither functional connectivity nor  
325 efference copy is that LMAN is involved in putting a plan into action, which in that case is  
326 to produce syllable variants that are unaffected by WN.

327 Zebra finches' ability to plan directed song changes could hinge on song memories that  
328 feed into LMAN and that could drive neurons there to produce diverse perceptual song  
329 variants. LMAN neurons are selective for the bird's own song but not the target song  
330 (20,21), which makes them well suited for planning song in a manner congruent with  
331 experience. Furthermore, LMAN neurons show mirrored activity, i.e., similar activity  
332 when a zebra finch produces a vocal gesture and when it hears the same gesture played  
333 through a loudspeaker (41,42). This mirrored activity has been argued to be involved in  
334 translating an auditory target into the corresponding motor command, also known as an

inverse model (43). Mirroring in LMAN was observed across the song variability generated over a period of several hours, which is about the same as the experience-dependent pitch planning limit we find. Zebra finches could thus transform a desired pitch change into the corresponding motor plan via LMAN's aligned sensory and motor representations of recent vocal output.

Our observations in zebra finches could be relevant to other species including humans. The planning abilities we find bear resemblance to human motor imagery for movement learning, which is most effective when subjects already show some competence for the movements to be learned (44), suggesting a recall-dependent process. Naively, human vocal flexibility seems superior to that of zebra finches, since we can flexibly change sound features such as loudness, pitch, and duration to convey emotional state or to comply with the tonal and rhythmical requirements of a musical piece (45,46), whereas zebra finches produce more subtle modulations of their songs e.g. when directing them to a female (47). Nevertheless, a limit of human vocal flexibility is revealed by non-native accents in foreign languages, which are nearly impossible to get rid of in adulthood. Thus, a seeming analogous task to re-pitching of zebra finch song, in humans, is to modify developmentally learned speech patterns.

Our findings help elucidate the meaning of song signals in songbirds and the evolutionary pressures of singing. Because zebra finches seem incapable of large jumps in performance without practice, their current song variants are indicative of the recent song history, implying that song is an honest signal that zebra finches cannot adapt at will to deceive a receiver of this signal. Hence, if high pitch has either an attractive or repelling effect on another bird, a singer must commit to being attractive or repulsive for some time. In extension, we speculate that limited vocal flexibility increases the level of commitment to a group and thereby strengthens social cohesion.

## Materials and Methods

All experimental procedures were in accordance with the Veterinary Office of the Canton of Zurich (licenses 123/2010 and 207/2013) or by the French Ministry of Research and the ethical committee Paris-Sud and Centre (CEEA N°59, project 2017-12).

### ***Subjects:***

We used in total 76 birds. All birds were 100-300 days old (except one 853-day old control bird) and were raised in the animal facility of the University of Zurich or in Saclay. During recording, birds were housed in single cages in custom-made sound-proof recording chambers equipped with a wall microphone (Audio-Technica Pro42), a loudspeaker, and a camera. The day/night cycle was set to 14/10 h except for one muted bird that was in constant light due to a technical problem.

### ***Song Recordings:***

Vocalizations were saved using custom song-recording software (Labview, National Instruments Inc.). Sounds were recorded with a wall microphone and digitized at 32 kHz. In all birds, we recorded baseline vocal activity for at least 3 days before doing any manipulation (deafening or pitch reinforcement).

### ***Pitch Reinforcement:***

We calculated pitch (fundamental frequency) as described in(14). To provide pitch reinforcement in real time, we used a two-layer neural network trained to detect a

384 manually clustered syllable containing a harmonic stack(48). We evaluated the  
385 fundamental frequency of that syllable in a 16-24-ms time window following detection.  
386 For pitch reinforcement, we either broadcast a 50-60-ms long white noise (WN) stimulus  
387 through a loudspeaker or briefly switched off the light in the isolation chamber for 100-  
388 500 ms (LO) when pitch was below or above a manually set threshold. The WN/ LO  
389 stimulus onset occurred 7 ms after the pitch calculation offset. We performed cumulative  
390 pitch shifts across several days by adjusting the pitch threshold for WN/LO delivery each  
391 day, usually setting it close to the median value of the previous day. Sometimes the  
392 threshold was set more than once during a day, in this case we set it close to the median of  
393 the pitch values measured so far during that day. All birds were shifted by at least 1  
394 standard deviation ( $d' > 1$ , see Section Pitch Analysis).

395 Reported pitch values were collected as above, except in muted birds that directly after  
396 unmuted produced syllables of lower amplitude and with distorted spectral features (e.g.  
397 Fig. 1C, E, F), which resulted in frequent mis-detections by the neural network. In muted  
398 birds, we therefore performed semi-automatic (manually corrected) syllable detection and  
399 we computed pitch at a fixed time lag after syllable onset.

#### 400 ***Duration Reinforcement:***

401 Duration reinforcement was performed similarly as pitch reinforcement but instead of  
402 measuring the pitch of a targeted syllable, we measured the duration of a targeted song  
403 element (either a syllable, a syllable plus the subsequent gap, or just a gap). Onsets and  
404 offsets of the targeted element were determined by thresholding of the root-mean square  
405 (RMS) sound amplitude.

#### 407 **Bird groups:**

408 ***WN Control (WNC):*** 18 birds in the control group underwent WN pitch reinforcement  
409 (10/18 up-shifted, 8/18 down-shifted). Thereafter, the WN stimulus was withdrawn, and  
410 no further experimental manipulation took place.

411 ***WN muted (WNm):*** in 8 birds, we first reinforced pitch using white noise (WN) auditory  
412 stimuli and then we reversibly muted the birds by performing an airsac cannulation.  
413 Normally, when WN stimuli are contingent on low-pitch renditions, birds tend to shift the  
414 pitch up, and in 5/6 birds this was indeed the case. However, one bird shifted the pitch  
415 down, in an apparent appetitive response to WN, this bird responded appetitively also  
416 when the WN contingency was changed, resulting in a net upward shift at the end of the  
417 WN period, see also(48). In 2 birds, we targeted high-pitch variants and these birds shifted  
418 the pitch down, as expected. Thus, in total, in 6/8 birds (including the bird with the  
419 apparent appetitive response), we drove the pitch up and in 2/8 birds, we drove the pitch  
420 down.

421 Two birds underwent the muting surgery directly after withdrawal of WN stimuli. To 6/8  
422 birds (4 up-shifted and 2 down-shifted), we provided the opportunity to sing without WN  
423 before the muting surgery. During on average 4h51mins (range 10 mins to 14h), these  
424 latter birds produced on average 649 song motifs (56, 100, 400, 458, 480, and 2400  
425 motifs) without WN; the example bird shown in Fig. 1C produced 56 song motifs within  
426 11 minutes during the 30 minutes it was allowed to sing without aversive reinforcement.

427 ***WN deaf (WNd):*** 10 birds were first pitch reinforced (5/10 were up-shifted and 5/10  
428 down-shifted) with WN and then they were deafened by bilateral cochlea removal. WNd  
429 birds started to sing on average  $3 \pm 1$  days after deafening (range 2 to 5 days) and were  
430 recorded for at least 15 days after the deafening surgery.

431 ***Deaf LO (dLO):*** 8/10 birds from (31) were recorded after the reinforcement period and we  
432 analyzed the associated data. These birds were first deafened by bilateral cochlea removal,  
433

434 then they underwent pitch reinforcement with light-off (LO) stimuli that acts as an  
435 appetitive stimulus in deaf birds. The lamp in the recording chamber was switched off for  
436 100-500 ms when the pitch was either above or below a manually set threshold (daily  
437 threshold adjustment followed the same procedure as for WNm birds). 3/8 birds received  
438 LO for low-pitched syllables and 5/8 birds for high-pitched syllables. One of the birds that  
439 received LO for high-pitched syllables changed its pitch away from LO instead of towards  
440 it, thus we ended up with a balanced data set with 4/8 birds shifting pitch up and 4/8 birds  
441 shifting down. dLO birds were recorded for at least 5 days after the deafening surgery.  
442 Details of light-induced pitch shifting are described in (31).

443 **Deaf control (dC):** we analyzed 26 syllables from 20 birds taken (12 from (31) and 8  
444 additional ones) that were deafened and then recorded without any further manipulation.  
445 We used these birds to discount for pitch changes in WNd and dLO birds due to absence  
446 of auditory feedback, see bootstrapping.

447 **WN duration (WNdur):** 12 birds underwent duration reinforcement using WN, in 9 birds  
448 the targeted sound feature was syllable duration, in 2 birds the targeted feature was  
449 syllable-plus-gap duration, and in one bird the targeted feature was gap duration. In 4  
450 birds, the duration was squeezed and in 8 birds the duration was stretched. As in WNC  
451 birds, we did no further experimental manipulation after withdrawal of the WN stimulus.  
452 One bird changed its duration towards WN showed an apparent appetitive response to WN  
453 as for the one muted bird.

### 454 **Muting**

455 We muted birds by inserting a by-pass cannula into the abdominal air sac (49) as follows.  
456 Preparation of by-pass cannula: After incubation in 70% ethanol, we clogged a 7 mm long  
457 polyimide tube (diameter 1.2 mm) with sterile paper tissue. We created a suture loop  
458 around the cannula and fixed the thread to the cannula with a knot and a drop of tissue  
459 glue.

460 Cannula implantation: We anaesthetized the birds with Isoflurane (1.5-2%) and gave a  
461 single injection of Carprofen (4 mg/kg). Subsequently, we applied local analgesic to the  
462 skin (2% lidocaine) and removed the feathers covering the right abdomen. We applied  
463 Betadine solution on the exposed skin and made a small incision using sterilized scissors.  
464 We exposed the right abdominal air sac by shifting aside the fat tissue and punctured it to  
465 create an opening. Immediately, we closed the opening by inserting the cannula and by  
466 sealing the contact region with tissue glue. With the free end of the glued thread, we made  
467 one suture to the lowest rib. We closed the wound in the skin around the cannula with  
468 tissue glue and sutures using a new thread. Finally, we applied betadine solution on the  
469 wound and lidocaine gel around the injured site. Before releasing the bird to its cage, we  
470 removed the clog of the cannula with forceps and verified the air flow through the  
471 cannula.  
472

473 We returned the birds to their home cage and monitored them for signs of suffering. We  
474 administered pain killers (Meloxicam 2 mg/kg or Carprofen 2-4 mg/kg) for 2 days after  
475 the surgery.

476 On the following days, we monitored the birds continuously for singing activity. If song  
477 was detected, the cannula was inspected for clogging and cleaned. 5 birds unmuted  
478 spontaneously, they produced at most 300 songs before the bypass cannula was inspected  
479 and the clog was removed to re-mute the bird. To unclog the bypass cannulas, we used  
480 sharp forceps and sterile tissue dipped in saline. 6 of 8 birds produced quiet call-like  
481 vocalizations even on muted days on which no singing was detected.

### 482 **Deafening**

483

484 We bilaterally removed cochleas as described in (31).

### 486 *Pitch Analysis*

487 In individual birds, we studied the dynamics of pitch recovery during the test period. In  
488 WNm birds, the test period started with unmuting, and in all other reinforced birds it  
489 started with the end of reinforcement. We analyzed songs in early (*E*) time windows  
490 defined as the first 2 h window during the test period in which the bird produced at least  
491 20 song motifs. We also assessed pitch recovery in late (*L*) windows defined exactly 4  
492 days after the *E* window. To make the measurements robust to circadian fluctuations of  
493 pitch, we compared the pitch values in early and late windows to pitch values produced in  
494 time-aligned windows during the last day of reinforcement (*R*) and during the last day of  
495 baseline (*B*).

496 We used this time-of-day matched analysis to produce Fig. 1H, I, Fig. 2. C, D and Fig. 3.  
497 C, D. Exceptions where time alignment was not possible are listed in the following:

- 498 • One WNm bird started singing late on the last day of reinforcement (preventing us  
499 from time-aligning the *R* window with the *E* window), and therefore in this bird  
500 we defined *R* after the end of WN but before muting (in this bird there is more than  
501 one day of song after WN and before muting).
- 502 • In two birds (1 WNC and 1 dLO bird), we defined the *L* window one day earlier  
503 (on the 4<sup>th</sup> day, after 3 days of practice), because there was no data for these birds  
504 on the 5<sup>th</sup> day after reinforcement (our findings did not qualitatively change when  
505 we defined the *L* window on the 6<sup>th</sup> day instead of the 4<sup>th</sup>).
- 506 • One WNm bird was housed together with a female during WN reinforcement; this  
507 bird did not sing during the time-match 2-h period on the 2<sup>nd</sup>, 3<sup>rd</sup>, and 4<sup>th</sup> day after  
508 reinforcement; therefore on those days we computed the mean pitch from all  
509 values produced on that day in Fig. 1H.

510 In early (*E*) and late (*L*) analysis windows, we computed the normalized residual pitch  
511 (*NRP*), which is the remaining fraction of pitch shift since release from WN, defined as  
512  $NRP(X) = (P_X - P_B)/(P_R - P_B)$ , where  $P_X$  is either the mean pitch in the early ( $X = E$ )  
513 or late ( $X = L$ ) window (Fig 1H, I, 2C, D, 3C, D).  $P_R$  and  $P_B$  are the mean pitches in the *R*  
514 and *B* windows, respectively. An *NRP* of 33% indicates that two-thirds of the reinforced  
515 pitch shift have been recovered and an *NRP* of 0% indicates full recovery of baseline  
516 pitch. Note that the *NRP* measure discounts for differences in the amount of initial pitch  
517 shift the birds displayed at the beginning of the test period.

518 We performed statistical testing of *NRP* to discount for this diversity in initial pitch. To  
519 test the hypothesis that WNm birds recovered their baseline pitch without practice or that  
520 WNd or dLO birds recovered baseline pitch without auditory feedback, we performed a  
521 two-tailed t-test for  $NRP = 0$ .

522 Our results were qualitatively unchanged when we changed the timing of the *L* window, as  
523 long as there were at least 3 days between *E* and *L* windows (because WNC birds need at  
524 least 3 days to recover their baseline pitch in the *L* window,  $p < 0.05$ ). Thus, giving deaf  
525 birds more time did not allow them to recover their baseline pitch. Furthermore, we also  
526 tested larger windows of 4 and 24 h duration instead of 2 h and found qualitatively similar  
527 results. We further verified that our results did not critically depend on the time-alignment  
528 by repeating the *NRP* tests using the last 2 h of reinforcement as the *R* windows. Indeed,  
529 we found that all results in Fig. 1-3 were unchanged.

530 We computed the pitch change after reinforcement (Fig. 4) as the difference in mean  
531 pitches between window *X* (first 2 h after withdrawal of the reinforcer  $X = E$ , or exactly 4  
532 days later  $X = L$ ) and the last 2 h of WN/LO reinforcement *R* in units of sensitivity  $d' =$

( $P_X - P_R$ )/ $S_R$ , where  $S_R$  is the standard deviation of pitch values in the  $R$  window. To test the hypothesis that WNd and dLO birds are able to make targeted pitch changes towards baseline, we performed a one-tailed t-test of the hypothesis  $H_0: d' < 0$ . Changes in the way in which we normalized  $d'$  values — dividing by  $S_B$ ,  $\sqrt{(S_B^2 + S_R^2)}/2$ , or  $\sqrt{(S_X^2 + S_R^2)}/2$  — did not qualitatively change the results shown in Fig. 4.

### Bootstrapping

To test whether deaf birds indeed make small pitch changes towards a target if and only if they experienced target-mismatch during reinforcement, we bootstrapped the difference in pitch changes between reinforced (WNd and dLO) and deaf control birds (dC). All dC birds were recorded for at least 5 days after they started singing while deaf.

In dC birds, we defined the  $R$ ,  $E$ , and  $L$  windows such that they matched those of WNd and dLO birds in terms of days since deafening. Additionally, in dLO birds we chose the windows such that they matched in terms of time-of-day (because LO always ended overnight). Thus, the  $R$  windows in dC birds either corresponded to the last 2 h before deafening (as control for WNd birds) or to the last 2 h of the day before  $E$  (as control for dLO birds).

For WNd birds, we obtained in total 26 control syllables from 20 dC birds. For dLO birds, we obtain 17 control syllables from 13 dC birds (some dC birds did not provide any useable data because they stopped singing or were not recorded for long enough).

For the bootstrapping procedure, we randomly paired control syllables ( $N=26$  for WNd and  $N=17$  for dLO) one-by-one with matchable syllables from reinforced birds (with replacement), computed the mean pitches  $P_R$ ,  $P_E$ ,  $P_L$  in corresponding windows, calculated the standard deviation  $S_R$ , calculated the average pitch changes  $d'_E = (P_E - P_R)/S_R$  and  $d'_L = (P_L - P_R)/S_R$  for both manipulated and control birds, and multiplied these by -1 if the reinforced bird was down-shifted (as we did for  $d'$  above). We then took the differences in average pitch changes between manipulated (WNd and dLO) and dC birds, e.g.  $d'_{E,WNd} - d'_{E,dC}$ . We repeated this procedure 10'000 times and plotted the distribution of average pitch change differences between WNd and dC (red) and between dLO and dC (blue) in Fig. 4E and perform bootstrap statistics.

Our results were qualitatively unchanged (only WNd significantly reverted pitch towards baseline) when we aligned the  $R$  windows by the time-of-day of the corresponding  $E$  windows (two dC birds started singing later on the day of the  $E$  window than they stopped singing on the days before; in these two birds we used the  $R$  windows instead), see Table S1. Although the  $d'$  values in both groups increased (and in dLO birds, the average  $d'$  in the  $L$  windows was positive,  $p < 0.05$ , two-tailed t-test), we found a significant pitch difference between WNd or dLO birds in  $L$  windows, which upholds our findings that mismatch experience is necessary for pitch reversion. The reason for the increases in  $d'$  likely is that birds further shifted their pitch away from baseline on the last day of reinforcement (after the time-aligned  $R$  window). Also, results were robust when we analyzed pitch changes after release from reinforcement in units of  $NRP$ : without practice, WNd birds made small and significant pitch changes towards baseline, and dLO birds stayed at  $NRP \geq 1$ .

577 **References**

- 578 1. Brecht KF, Hage SR, Gavrillov N, Nieder A. Volitional control of vocalizations in corvid  
579 songbirds. *PLoS Biol.* 2019 Aug 27;17(8):e3000375.
- 580 2. Veit L, Tian LY, Monroy Hernandez CJ, Brainard MS. Songbirds can learn flexible  
581 contextual control over syllable sequencing. *Elife.* 2021 Jun 1;10.
- 582 3. Brashers-Krug T, Shadmehr R, Bizzi E. Consolidation in human motor memory. *Nature.*  
583 1996 Jul 18;382(6588):252–255.
- 584 4. Galea JM, Vazquez A, Pasricha N, de Xivry J-JO, Celnik P. Dissociating the roles of the  
585 cerebellum and motor cortex during adaptive learning: the motor cortex retains what the  
586 cerebellum learns. *Cereb Cortex.* 2011 Aug;21(8):1761–1770.
- 587 5. Shmuelof L, Huang VS, Haith AM, Delnicki RJ, Mazzoni P, Krakauer JW. Overcoming  
588 motor “forgetting” through reinforcement of learned actions. *J Neurosci.* 2012 Oct  
589 17;32(42):14617–14621.
- 590 6. Krakauer JW, Ghez C, Ghilardi MF. Adaptation to visuomotor transformations:  
591 consolidation, interference, and forgetting. *J Neurosci.* 2005 Jan 12;25(2):473–478.
- 592 7. Sheahan HR, Franklin DW, Wolpert DM. Motor planning, not execution, separates motor  
593 memories. *Neuron.* 2016 Nov 23;92(4):773–779.
- 594 8. Konishi M. Birdsong: from behavior to neuron. *Annu Rev Neurosci.* 1985;8:125–170.
- 595 9. Immelmann K. Song development in the zebra finch and other estrildid finches. *Bird*  
596 *vocalizations.* 1969;
- 597 10. Park S-W, Dijkstra TMH, Sternad D. Learning to never forget-time scales and specificity of  
598 long-term memory of a motor skill. *Front Comput Neurosci.* 2013 Sep 2;7:111.
- 599 11. Smith MA, Ghazizadeh A, Shadmehr R. Interacting adaptive processes with different  
600 timescales underlie short-term motor learning. *PLoS Biol.* 2006 Jun;4(6):e179.
- 601 12. Tumer EC, Brainard MS. Performance variability enables adaptive plasticity of  
602 “crystallized” adult birdsong. *Nature.* 2007 Dec 20;450(7173):1240–1244.
- 603 13. Andalman AS, Fee MS. A basal ganglia-forebrain circuit in the songbird biases motor  
604 output to avoid vocal errors. *Proc Natl Acad Sci USA.* 2009 Jul 28;106(30):12518–12523.
- 605 14. Canopoli A, Herbst JA, Hahnloser RHR. A higher sensory brain region is involved in  
606 reversing reinforcement-induced vocal changes in a songbird. *J Neurosci.* 2014 May  
607 14;34(20):7018–7026.
- 608 15. Warren TL, Tumer EC, Charlesworth JD, Brainard MS. Mechanisms and time course of  
609 vocal learning and consolidation in the adult songbird. *J Neurophysiol.* 2011  
610 Oct;106(4):1806–1821.
- 611 16. Hoffmann LA, Saravanan V, Wood AN, He L, Sober SJ. Dopaminergic contributions to  
612 vocal learning. *J Neurosci.* 2016 Feb 17;36(7):2176–2189.
- 613 17. Aronov D, Andalman AS, Fee MS. A specialized forebrain circuit for vocal babbling in the  
614 juvenile songbird. *Science.* 2008 May 2;320(5876):630–634.
- 615 18. Nottebohm F, Stokes TM, Leonard CM. Central control of song in the canary, *Serinus*  
616 *canarius.* *J Comp Neurol.* 1976 Feb 15;165(4):457–486.
- 617 19. Prather JF, Nowicki S, Anderson RC, Peters S, Mooney R. Neural correlates of categorical  
618 perception in learned vocal communication. *Nat Neurosci.* 2009 Feb;12(2):221–228.

- 619 20. Yazaki-Sugiyama Y, Mooney R. Sequential learning from multiple tutors and serial  
620 retuning of auditory neurons in a brain area important to birdsong learning. *J Neurophysiol.*  
621 2004 Nov;92(5):2771–2788.
- 622 21. Kojima S, Doupe AJ. Song selectivity in the pallial-basal ganglia song circuit of zebra  
623 finches raised without tutor song exposure. *J Neurophysiol.* 2007 Oct;98(4):2099–2109.
- 624 22. Yanagihara S, Yazaki-Sugiyama Y. Auditory experience-dependent cortical circuit shaping  
625 for memory formation in bird song learning. *Nat Commun.* 2016 Jun 21;7:11946.
- 626 23. Yu K, Wood WE, Theunissen FE. High-capacity auditory memory for vocal  
627 communication in a social songbird. *Sci Adv.* 2020 Nov 13;6(46).
- 628 24. Ritters LV, Spool JA, Merullo DP, Hahn AH. Song practice as a rewarding form of play in  
629 songbirds. *Behav Processes.* 2019 Jun;163:91–98.
- 630 25. Kollmorgen S, Hahnloser RHR, Mante V. Nearest neighbours reveal fast and slow  
631 components of motor learning. *Nature.* 2020 Jan 8;577(7791):526–530.
- 632 26. Kojima S, Doupe AJ. Social performance reveals unexpected vocal competency in young  
633 songbirds. *Proc Natl Acad Sci USA.* 2011 Jan 25;108(4):1687–1692.
- 634 27. Elemans CPH, Rasmussen JH, Herbst CT, Düring DN, Zollinger SA, Brumm H, et al.  
635 Universal mechanisms of sound production and control in birds and mammals. *Nat*  
636 *Commun.* 2015 Nov 27;6:8978.
- 637 28. Galea JM, Mallia E, Rothwell J, Diedrichsen J. The dissociable effects of punishment and  
638 reward on motor learning. *Nat Neurosci.* 2015 Apr;18(4):597–602.
- 639 29. Suthers RA, Goller F, Wild JM. Somatosensory feedback modulates the respiratory motor  
640 program of crystallized birdsong. *Proc Natl Acad Sci USA.* 2002 Apr 16;99(8):5680–5685.
- 641 30. Yamahachi H, Zai AT, Tachibana RO, Stepien AE, Rodrigues DI, Cavé-Lopez S, et al.  
642 Undirected singing rate as a non-invasive tool for welfare monitoring in isolated male zebra  
643 finches. *PLoS One.*
- 644 31. Zai AT, Cavé-Lopez S, Rolland M, Giret N, Hahnloser RHR. Sensory substitution reveals a  
645 manipulation bias. *Nat Commun.* 2020 Nov 23;11(1):5940.
- 646 32. Zai AT, Cavé-Lopez S, Rolland M, Giret N, Hahnloser RHR. Sensory substitution reveals a  
647 manipulation bias (Data set). *ETH Research Collection*; 2020.
- 648 33. Sober SJ, Brainard MS. Adult birdsong is actively maintained by error correction. *Nat*  
649 *Neurosci.* 2009 Jul;12(7):927–931.
- 650 34. Zevin JD, Seidenberg MS, Bottjer SW. Limits on reacquisition of song in adult zebra  
651 finches exposed to white noise. *J Neurosci.* 2004 Jun 30;24(26):5849–5862.
- 652 35. Hough GE, Volman SF. Short-term and long-term effects of vocal distortion on song  
653 maintenance in zebra finches. *J Neurosci.* 2002 Feb 1;22(3):1177–1186.
- 654 36. Fenn KM, Nusbaum HC, Margoliash D. Consolidation during sleep of perceptual learning  
655 of spoken language. *Nature.* 2003 Oct 9;425(6958):614–616.
- 656 37. Karni A, Sagi D. The time course of learning a visual skill. *Nature.* 1993 Sep  
657 16;365(6443):250–252.
- 658 38. Tian LY, Brainard MS. Discrete Circuits Support Generalized versus Context-Specific  
659 Vocal Learning in the Songbird. *Neuron.* 2017 Dec 6;96(5):1168–1177.e5.



- 660 39. Tachibana RO, Lee D, Kai K, Kojima S. Performance-Dependent Consolidation of Learned  
661 Vocal Changes in Adult Songbirds. *J Neurosci*. 2022 Mar 9;42(10):1974–1986.
- 662 40. Charlesworth JD, Warren TL, Brainard MS. Covert skill learning in a cortical-basal ganglia  
663 circuit. *Nature*. 2012 May 20;486(7402):251–255.
- 664 41. Hanuschkin A, Ganguli S, Hahnloser R. A Hebbian learning rule gives rise to mirror  
665 neurons and links them to control theoretic inverse models. *frontiersin.org*.
- 666 42. Oztup E, Kawato M, Arbib MA. Mirror neurons: functions, mechanisms and models.  
667 *Neurosci Lett*. 2013 Apr 12;540:43–55.
- 668 43. Giret N, Kornfeld J, Ganguli S, Hahnloser RHR. Evidence for a causal inverse model in an  
669 avian cortico-basal ganglia circuit. *Proc Natl Acad Sci USA*. 2014 Apr 22;111(16):6063–  
670 6068.
- 671 44. Mulder T, Zijlstra S, Zijlstra W, Hochstenbach J. The role of motor imagery in learning a  
672 totally novel movement. *Exp Brain Res*. 2004 Jan;154(2):211–217.
- 673 45. Dichter BK, Breshears JD, Leonard MK, Chang EF. The control of vocal pitch in human  
674 laryngeal motor cortex. *Cell*. 2018 Jun 28;174(1):21–31.e9.
- 675 46. Belyk M, Brown S. Pitch underlies activation of the vocal system during affective  
676 vocalization. *Soc Cogn Affect Neurosci*. 2016;11(7):1078–1088.
- 677 47. Stepanek L, Doupe AJ. Activity in a cortical-basal ganglia circuit for song is required for  
678 social context-dependent vocal variability. *J Neurophysiol*. 2010 Nov;104(5):2474–2486.
- 679 48. Yamahachi H, Zai AT, Tachibana RO, Stepien AE, Rodrigues DI, Cavé-Lopez S, et al.  
680 Undirected singing rate as a non-invasive tool for welfare monitoring in isolated male zebra  
681 finches. *PLoS One*. 2020 Aug 10;15(8):e0236333.
- 682 49. Nilson PC, Teramitsu I, White SA. Caudal thoracic air sac cannulation in zebra finches for  
683 isoflurane anesthesia. *J Neurosci Methods*. 2005 Apr 30;143(2):107–115.
- 684 50. Lipkind D, Tchernichovski O. Quantification of developmental birdsong learning from the  
685 subsyllabic scale to cultural evolution. *Proc Natl Acad Sci USA*. 2011 Sep 13;108 Suppl  
686 3:15572–15579.
- 687 51. Glaze CM, Troyer TW. Development of temporal structure in zebra finch song. *J*  
688 *Neurophysiol*. 2013 Feb;109(4):1025–1035.
- 689 52. Ali F, Otchy TM, Pehlevan C, Fantana AL, Burak Y, Ölveczky BP. The basal ganglia is  
690 necessary for learning spectral, but not temporal, features of birdsong. *Neuron*. 2013 Oct  
691 16;80(2):494–506.
- 692 53. Canopoli A, Hahnloser RH, Zai AT. Lesions of a higher auditory brain area during a  
693 sensorimotor period do not impair birdsong learning . *Matters Journal*. 2016 Mar 14;
- 694 54. Roberts TF, Hisey E, Tanaka M, Kearney MG, Chattree G, Yang CF, et al. Identification of  
695 a motor-to-auditory pathway important for vocal learning. *Nat Neurosci*. 2017  
696 Jul;20(7):978–986.

697

698

699

700

701

702

## Acknowledgments

We thank Manon Rolland and Sophie Cavé-Lopez for performing some of the deafening surgeries and their support with the experiments, and Heiko Hörster for providing excellent animal breeding and animal care services.

703  
704  
705  
706  
707  
708  
709  
710  
711  
712  
713  
714  
715  
716  
717  
718  
719  
720  
721  
722  
723  
724  
725  
726  
727  
728

**Funding:**

Swiss National Science Foundation (Projects 31003A\_182638 and 31003A\_156976/1)  
European Research Council (ERC) Advanced Grant (268911, VOTECOM)

**Author contributions:**

Conceptualization: ATZ, AES, RHRH  
Investigation: ATZ, AES, NG  
Data Curation: ATZ, AES  
Formal analysis : ATZ, RHRH  
Visualization: ATZ, AES, RHRH  
Funding acquisition: NG, RHRH  
Supervision: NG, RHRH  
Writing – original draft: ATZ, AES, RHRH  
Writing – review & editing: ATZ, AES, NG, RHRH

**Competing interests:** Authors declare that they have no competing interests.

**Data and materials availability:** Pitch and duration data that support the findings of this study together with the MATLAB scripts to reproduce the analysis and figures will be made available at the ETH Research Collection upon publication of the article. The raw data underlying the pitch measurement is not deposited due to its size but is available from the authors upon reasonable request.
